# Supplementary material
Source: PubMed Central journal article supplement (PMC3600464)
Supplement: 1215768110_sapp.pdf [file 1215768110_sapp.pdf]

## SUPPORTING INFORMATION

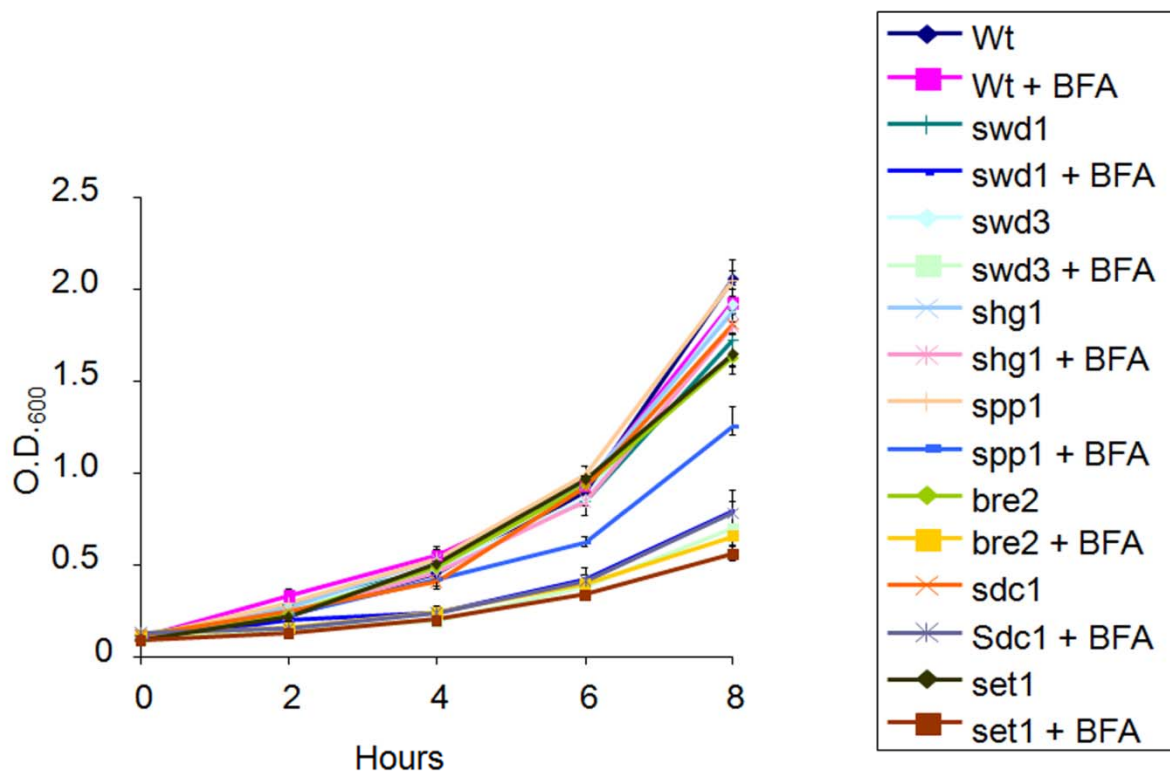

**Figure S1. Set1 complex subunits are necessary for resistance to Brefeldin A.**

Growth curve analysis over 8 hours of strains containing deletion cassettes at the Set1 complex subunit loci. Strains were either treated with 100 µg/ml Brefeldin A dissolved in ethanol or in an equal volume of ethanol.

## SUPPORTING INFORMATION

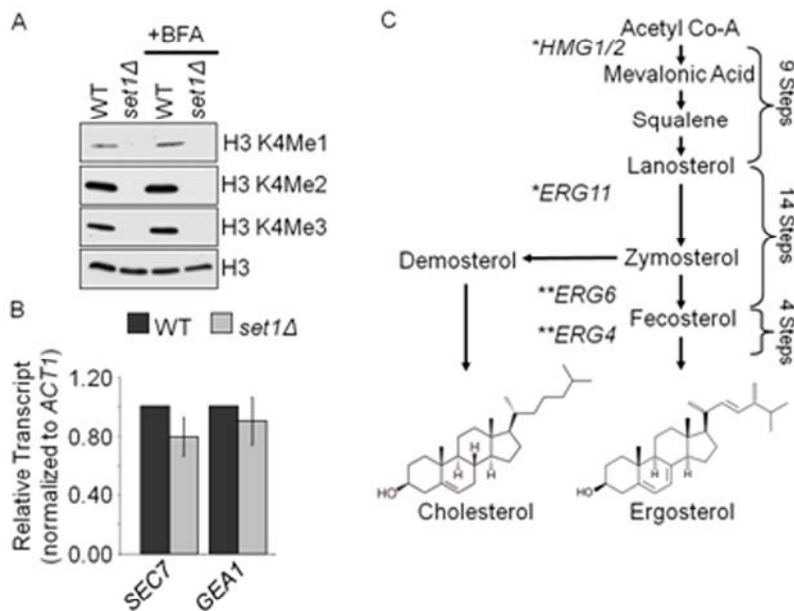

**Figure S2. Brefeldin A does not affect H3K4 methylation.** A. Western blot analysis of WT and *set1Δ* strains in the presence of Brefeldin A. H3K4 methylation was determined using antibodies specific to mono-, di-, and trimethylation of H3K4. H3 antibody was used as a loading control. C. Schematic of the ergosterol and cholesterol biosynthetic pathway with indicated names of conserved and yeast specific genes tested for gene expression analysis. Single asterisks indicate genes conserved between the ergosterol and cholesterol pathways. Double asterisks indicate ergosterol specific genes. B. Expression of *SEC7* and *GEA1* was determined in the *set1Δ* strain by qRT-PCR analysis. All expression analysis was relative to wild-type (WT) strain using Actin (*ACT1*) as an internal control to normalize expression levels. Data were analyzed from a minimum of three biological repeats with three technical repeats each.

## SUPPORTING INFORMATION

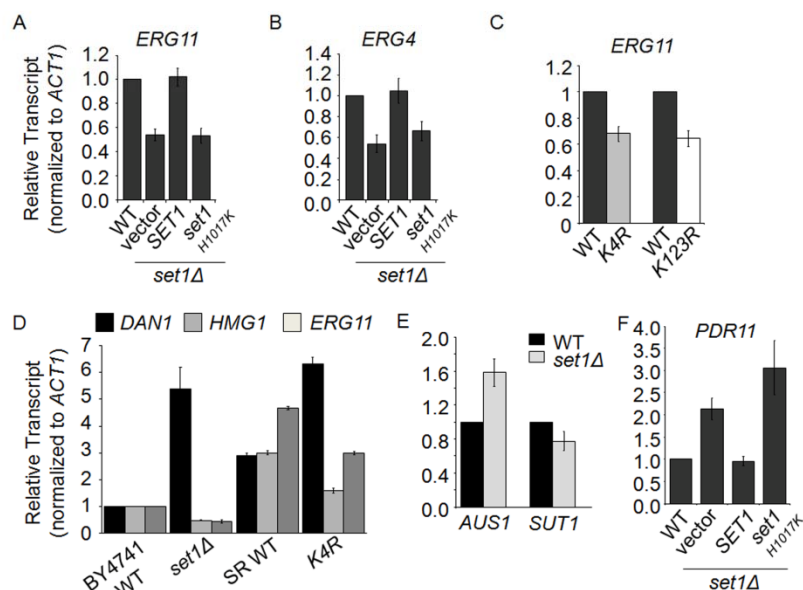

**Figure S3. H3K4 methylation and Set1 methyltransferase activity are necessary for proper gene expression.** A-F. Relative transcript levels of *DAN1*, *ERG11*, *ERG4*, *AUS1*, *SUT1* and *HMG1* were determined in the indicated strains by qRT-PCR analysis. All expression analysis was relative to wild-type (WT) strain using Actin (*ACT1*) as an internal control to normalize expression levels. Data were analyzed from three biological repeats with three technical repeats. Each error bar represents the standard error of the mean. Statistical significance of gene expression analysis is indicated in Tables S6-S11.

## SUPPORTING INFORMATION

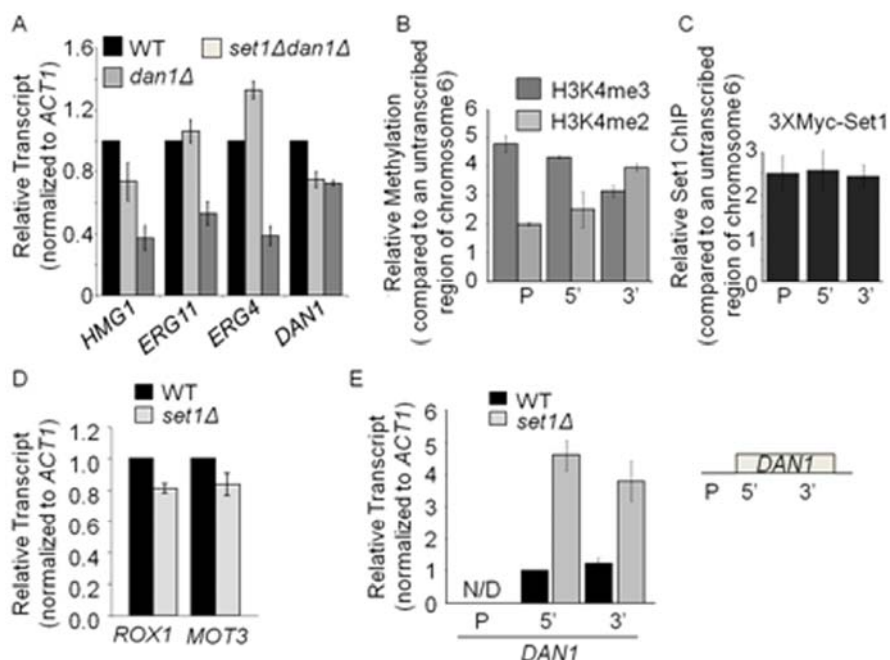

**Figure S4. Set1 mediated repression of *DAN1* is not through reduced expression of *DAN1* repressors.** A. Relative transcript levels of *DAN1*, *ERG11*, *ERG4*, and *HMG1* were determined in the indicated strains by qRT-PCR analysis. All expression analysis was relative to a wild-type (WT) strain using Actin (*ACT1*) as an internal control to normalize expression levels. Data were analyzed from three biological repeats with three technical repeats. Each error bar represents the standard error of the mean. Statistical significance of gene expression analysis is indicated in Tables S6-S11. B-C. ChIP analysis from the indicated strains were performed using antibodies specific to a 3XMYC-tag for detection of Set1, histone H3K4 di- and trimethylation, and histone H3. ChIP analysis for H3K4 di- and trimethylation was normalized to input and histone H3 and relative to a ChIP from an untranscribed region of chromosome 6. ChIP analysis for 3XMYC-Set1 was normalized to input and relative to WT untagged strain and relative to a ChIP from an untranscribed region of chromosome 6. All ChIP analysis was performed using three biological repeats with three technical replicates; error bars represent the standard error of the mean. D. Relative transcript levels of *ROX1* and *MOT3* were determined in the indicated strains by qRT-PCR analysis. E. Gene expression analysis using probes specific to the promoter, 5' and 3' regions of *DAN1* in WT and *set1Δ* strains. All expression analysis was relative to WT strain using Actin (*ACT1*) as an internal control to normalize expression levels. Data were analyzed from a minimum of three biological repeats with three technical repeats each.

## SUPPORTING INFORMATION

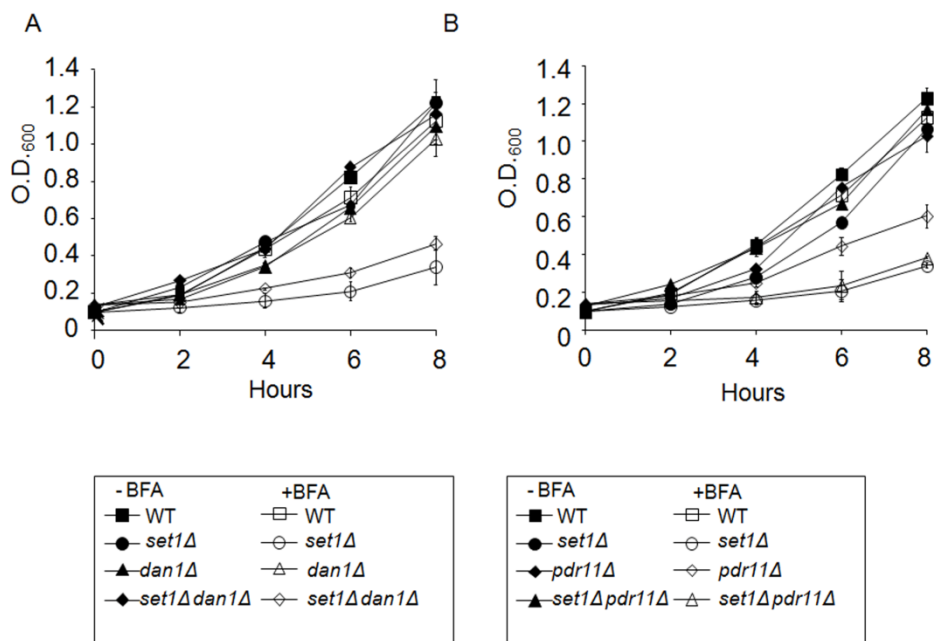

**Figure S5. *Set1* dependent growth in the presence of BFA is not dependent on ergosterol uptake genes in the absence of exogenous ergosterol.** A-B, Growth curve analysis over 8 hours of the indicated strains. Strains were either treated with 100  $\mu\text{g/ml}$  Brefeldin A dissolved in ethanol or in an equal volume of ethanol in the absence of exogenous ergosterol. Data were combined from three biological repeats. Error bars are calculated standard error of the mean.

**SUPPORTING INFORMATION**

**Table S1. Strains**

| Yeast strain                    | Genotype                                                                                                                                                                                                       | Reference       |
|---------------------------------|----------------------------------------------------------------------------------------------------------------------------------------------------------------------------------------------------------------|-----------------|
| BY4741                          | <i>MAT<math>\alpha</math> his3<math>\Delta</math> leu2<math>\Delta</math>0 LYS2 met15<math>\Delta</math>0 ura3<math>\Delta</math>0</i>                                                                         | Open Biosystems |
| <i>bre2<math>\Delta</math></i>  | BY4741: <i>MAT<math>\alpha</math> his3<math>\Delta</math> leu2<math>\Delta</math>0 LYS2 met15<math>\Delta</math>0 ura3<math>\Delta</math>0 bre2<math>\Delta</math>::KanMX</i>                                  | Open Biosystems |
| <i>sdc1<math>\Delta</math></i>  | BY4741: <i>MAT<math>\alpha</math> his3<math>\Delta</math> leu2<math>\Delta</math>0 LYS2 met15<math>\Delta</math>0 ura3<math>\Delta</math>0 sdc1<math>\Delta</math>::KanMX</i>                                  | Open Biosystems |
| <i>spp1<math>\Delta</math></i>  | BY4741: <i>MAT<math>\alpha</math> his3<math>\Delta</math> leu2<math>\Delta</math>0 LYS2 met15<math>\Delta</math>0 ura3<math>\Delta</math>0 spp1<math>\Delta</math>::KanMX</i>                                  | Open Biosystems |
| <i>swd1<math>\Delta</math></i>  | BY4741: <i>MAT<math>\alpha</math> his3<math>\Delta</math> leu2<math>\Delta</math>0 LYS2 met15<math>\Delta</math>0 ura3<math>\Delta</math>0 swd1<math>\Delta</math>::KanMX</i>                                  | Open Biosystems |
| <i>swd3<math>\Delta</math></i>  | BY4741: <i>MAT<math>\alpha</math> his3<math>\Delta</math> leu2<math>\Delta</math>0 LYS2 met15<math>\Delta</math>0 ura3<math>\Delta</math>0 swd3<math>\Delta</math>::KanMX</i>                                  | Open Biosystems |
| <i>shg1<math>\Delta</math></i>  | BY4741: <i>MAT<math>\alpha</math> his3<math>\Delta</math> leu2<math>\Delta</math>0 LYS2 met15<math>\Delta</math>0 ura3<math>\Delta</math>0 shg1<math>\Delta</math>::KanMX</i>                                  | Open Biosystems |
| <i>erg4<math>\Delta</math></i>  | BY4741: <i>MAT<math>\alpha</math> his3<math>\Delta</math> leu2<math>\Delta</math>0 LYS2 met15<math>\Delta</math>0 ura3<math>\Delta</math>0 erg4<math>\Delta</math>::KanMX</i>                                  | Open Biosystems |
| <i>bre1<math>\Delta</math></i>  | BY4741: <i>MAT<math>\alpha</math> his3<math>\Delta</math> leu2<math>\Delta</math>0 LYS2 met15<math>\Delta</math>0 ura3<math>\Delta</math>0 bre1<math>\Delta</math>::KanMX</i>                                  | Open Biosystems |
| <i>set2<math>\Delta</math></i>  | BY4741: <i>MAT<math>\alpha</math> his3<math>\Delta</math> leu2<math>\Delta</math>0 LYS2 met15<math>\Delta</math>0 ura3<math>\Delta</math>0 set2<math>\Delta</math>::KanMX</i>                                  | Open Biosystems |
| <i>dot1<math>\Delta</math></i>  | BY4741: <i>MAT<math>\alpha</math> his3<math>\Delta</math> leu2<math>\Delta</math>0 LYS2 met15<math>\Delta</math>0 ura3<math>\Delta</math>0 dot1<math>\Delta</math>::KanMX</i>                                  | Open Biosystems |
| <i>dan1<math>\Delta</math></i>  | BY4741: <i>MAT<math>\alpha</math> his3<math>\Delta</math> leu2<math>\Delta</math>0 LYS2 met15<math>\Delta</math>0 ura3<math>\Delta</math>0 dan1<math>\Delta</math>::KanMX</i>                                  | Open Biosystems |
| <i>pdr11<math>\Delta</math></i> | BY4741: <i>MAT<math>\alpha</math> his3<math>\Delta</math> leu2<math>\Delta</math>0 LYS2 met15<math>\Delta</math>0 ura3<math>\Delta</math>0 prd11<math>\Delta</math>::KanMX</i>                                 | Open Biosystems |
| <i>set3<math>\Delta</math></i>  | BY4741: <i>MAT<math>\alpha</math> his3<math>\Delta</math> leu2<math>\Delta</math>0 LYS2 met15<math>\Delta</math>0 ura3<math>\Delta</math>0 set3<math>\Delta</math>::KanMX</i>                                  | Open Biosystems |
| SDBY1210                        | BY4741: <i>MAT<math>\alpha</math> his3<math>\Delta</math> leu2<math>\Delta</math>0 LYS2 met15<math>\Delta</math>0 ura3<math>\Delta</math>0 set1<math>\Delta</math>::HygMX</i>                                  | This study      |
| SDBY1215                        | BY4741: <i>MAT<math>\alpha</math> his3<math>\Delta</math> leu2<math>\Delta</math>0 LYS2 met15<math>\Delta</math>0 ura3<math>\Delta</math>0 dan1<math>\Delta</math>::KanMX set1<math>\Delta</math>::HygMX</i>   | This study      |
| SDBY1216                        | BY4741: <i>MAT<math>\alpha</math> his3<math>\Delta</math> leu2<math>\Delta</math>0 LYS2 met15<math>\Delta</math>0 ura3<math>\Delta</math>0 pdr11<math>\Delta</math>::KanMX set1<math>\Delta</math>::HygMX</i>  | This study      |
| SDBY1217                        | <i>MAT<math>\alpha</math> his3<math>\Delta</math> leu2<math>\Delta</math>0 LYS2 met15<math>\Delta</math>0 ura3<math>\Delta</math>0 HMG1 3xFLAG::KanMX</i>                                                      | This study      |
| SDBY1218                        | <i>MAT<math>\alpha</math> his3<math>\Delta</math> leu2<math>\Delta</math>0 LYS2 met15<math>\Delta</math>0 ura3<math>\Delta</math>0 HMG1 3xFLAG::KanMX set1<math>\Delta</math>::HygMX</i>                       | This study      |
| SDBY1001                        | <i>MAT<math>\alpha</math>, ura3-52, lys2-801, ade2-101, trp1<math>\Delta</math>63, his3<math>\Delta</math>200, leu2<math>\Delta</math>1, hht1-hhf1::pWZ405-F2F9-LEU2, hht2-hhf2::pWZ403-F4F10-HIS3::pJH18</i>  | (1)             |
| SDBY1004                        | <i>MAT<math>\alpha</math>, ura3-52, lys2-801, ade2-101, trp1<math>\Delta</math>63, his3<math>\Delta</math>200, leu2<math>\Delta</math>1, hht1-hhf1::pWZ405-F2F9-LEU2, hht2-hhf2::pWZ403-F4F10-HIS3::pHCL54</i> | (1)             |
| SDBY1005                        | <i>MAT<math>\alpha</math>, ura3-52, lys2-801, ade2-101, trp1<math>\Delta</math>63, his3<math>\Delta</math>200, leu2<math>\Delta</math>1, hht1-hhf1::pWZ405-F2F9-LEU2, hht2-hhf2::pWZ403-F4F10-HIS3::pHCL55</i> | (1)             |

## SUPPORTING INFORMATION

|          |                                                                                                                                        |            |
|----------|----------------------------------------------------------------------------------------------------------------------------------------|------------|
| SDBY1006 | <i>MATa, ura3-52, lys2-801, ade2-101, trp1Δ63, his3Δ200, leu2Δ1, hht1-hhf1::pWZ405-F2F9-LEU2, hht2-hhf2::pWZ403-F4F10-HIS3::pHCL56</i> | (1)        |
| SDBY1211 | as SDBY1210 with pRS415                                                                                                                | This study |
| SDBY1212 | as SDBY1210 with pDPM32                                                                                                                | This study |
| SDBY1213 | as SDBY1210 with pPFS56                                                                                                                | This study |
| SDBY1214 | as BY4741 with pRS415                                                                                                                  | This study |
| FY406    | <i>MATa (hta1-htb1)Δ::LEU2 (hta2-htb2)Δ::TRP1 leu2Δ1 ura3-52 lys2Δ1 lys2Δ128 his3Δ200 trp1Δ63 &lt;psab6&gt;</i>                        | (2)        |
| YKG002   | <i>MATa (hta1-htb1)Δ::LEU2 (hta2-htb2)Δ::TRP1 leu2Δ1 ura3-52 lys2Δ1 lys2Δ128 his3Δ200 trp1Δ63 &lt;pZS146 (K123R)&gt;</i>               | (2)        |

**Table S2. Plasmids**

| Plasmid | Inserted Gene            | Promoter    | Vector | Source     |
|---------|--------------------------|-------------|--------|------------|
| pRS415  | None                     |             | pRS415 |            |
| pDPM32  | <i>3xMYC-SET1</i>        | <i>SET1</i> | pRS415 | This Study |
| pPFS56  | <i>3xMYC-set1 H1017K</i> | <i>SET1</i> | pRS415 | This Study |

**Table S3. Primers for qRT-PCR**

| Primer name       | Sequence                   |
|-------------------|----------------------------|
| <i>ACT1-001F</i>  | TGGATTCCGGTGATGGTGTT       |
| <i>ACT1-002R</i>  | TCAAAATGGCGTGAGGTAGAGA     |
| <i>HMG1-001F</i>  | CACCATATTCGGCCTCTTCAA      |
| <i>HMG1-002R</i>  | GGCGCTCAACCAAAAATTTG       |
| <i>ERG4-001F</i>  | CAACTCGGTGTTCCCATGGT       |
| <i>ERG4-002R</i>  | AAGGCTCTGTGAATCAGGACAAC    |
| <i>ERG6-001F</i>  | AAGAACAACCTTGCCCAAAGG      |
| <i>ERG6-002R</i>  | CGGTTCTACCATCCCAATTTCTC    |
| <i>ERG11-001F</i> | CACGAATTTGTCTTCAACGCTAA    |
| <i>ERG11-002R</i> | AGTCAAATGAGCGTAAGCAGCTT    |
| <i>HMG2-001F</i>  | ACATGAGGAAAATCGGATCAAAG    |
| <i>HMG2-002R</i>  | GCGCATGCAGAGTTTGAA         |
| <i>DAN1-001F</i>  | GGCGATTCACCACCATGTT        |
| <i>DAN1-002R</i>  | CCGGTGATCATTCTGGTCACT      |
| <i>AUS1-001F</i>  | TGAGGACAGCATGCCGAAT        |
| <i>AUS1-002R</i>  | GCCTCTGCTTGGAAGGTTATGT     |
| <i>PDR11-001F</i> | CGGTGGAGCAAACCATTGAT       |
| <i>PDR11-002R</i> | ACGCTCTTGCTTGGGAATGT       |
| <i>SUT1-001F</i>  | GCACGCTGTTGCGGAATAT        |
| <i>SUT1-002R</i>  | GCGTGAGCCTGTACCCTCAA       |
| <i>SEC7-001F</i>  | GGCTATCAGAACAATCTACAACGTTT |

## SUPPORTING INFORMATION

|                  |                               |
|------------------|-------------------------------|
| <i>SEC7-002R</i> | AGGTGCGCCTGTGCAATACCT         |
| <i>GEA1-001F</i> | CAGTCGAGGATGGGTGTGAAG         |
| <i>GEA1-002R</i> | TGGAACGACTAGAAAGATCAATAATAGAA |
| <i>ROX1-001F</i> | CGACCCTTCAACGAGACATCA         |
| <i>ROX1-002R</i> | TCGAGTTAGCCCTTGGTTGAG         |
| <i>MOT3-001F</i> | TGGCGTCACAGCCTTTCAA           |
| <i>MOT3-002R</i> | TTCACCATAACGTCGTCCTTGT        |

**Table S4. Probe sets for ChIP analysis**

| Primer name           | Sequence 5'-3'                                                                                        |
|-----------------------|-------------------------------------------------------------------------------------------------------|
| <i>HMG1</i> promoter  | /56-FAM/AGTGC GAAG/ZEN/AAAACGTAGTGC GAGT/3IABkFQ/<br>GAAGAGTTGGAAGACCTCAGC<br>AGATCCTATAGCTAGTACGGAC  |
| <i>HMG1</i> 5'        | /56-FAM/TGAATGACG/ZEN/GATAGATAAGCGAATGCGG/3IABkFQ/<br>CGGCGAAACGACCAATTC<br>GTGTTGGAGTCTTTATTTGGAGC   |
| <i>HMG1</i> 3'        | /56-FAM/AGGTTTTGT/ZEN/TGGTTCAGCAGGTTTCC/3IABkFQ/<br>CGGCCATTTGGTTCAAAGTC<br>ACGATTTATATCAGTGGCGTCC    |
| <i>DAN1</i> promoter  | /56-FAM/AGATCTTGG/ZEN/CATTTTCAAAGGCACGC/3IABkFQ/<br>GTTTCATGTTTCCTGCGCG<br>GGACCCTTTTGCATTTCTAGC      |
| <i>DAN1</i> 5'        | /56-FAM/AAATCGCCA/ZEN/CCGGCAAAAACAGC/3IABkFQ/<br>CACCTGAAATACCAGTCAACATG<br>AAGACTGAACATACCCACCTG     |
| <i>DAN1</i> 3'        | /56-FAM/AGCCAGTCT/ZEN/CCTCCAAAGCTCAATC/3IABkFQ/<br>AGACTCCAAGCTTCCACTGTTG<br>TGACGATGTGACAGAAGTAGC    |
| <i>ERG6</i> promoter  | /56-FAM/ACCTCCAAT/ZEN/ACTTGCTGTTGCCGA/3IABkFQ/<br>TGCTCCACTTCGTCTCAATG<br>GGATAGGAGAAAACACCCGAAC      |
| <i>ERG6</i> 5'        | /56-FAM/TCTGAACGG/ZEN/CTTCCTTTTGGGCA/3IABkFQ/<br>GGTTTGAGTGCATTGATGTCG<br>TCGGCATCTTTATCGGTTCTAC      |
| <i>ERG6</i> 3'        | /56-FAM/AGGAAGCCA/ZEN/GAAAACGCCGAAAC/3IABkFQ/<br>TCGGCATCTTTATCGGTTCTAC<br>TTCTTGGGAAGTTTGGGAGG       |
| <i>ERG11</i> promoter | /56-FAM/TCGTTAACT/ZEN/CGTGGAGATGCACAATAGG/3IABkFQ/<br>GCAGGAGACATCGATTTTATGC<br>GAGGCTTTTCGAATACATGCG |
| <i>ERG11</i> 5'       | /56-FAM/TGGGCCAAT/ZEN/GGTAAGCCAAGAAATG/3IABkFQ/                                                       |



## SUPPORTING INFORMATION

TTGGAGAGGCATTGGAATACG  
 TCCTTTCTCAAAGAATATAGTAATTGCC  
*ERG11 3'* /56-FAM/ACCGTTCCA/ZEN/CCTCCTGACTTTACATCT/3IABkFQ/  
 AAATGGCATTACCCAGAGGG  
 TTTGTTCTGGATTTCTCTTTTCCC  
 Untranscribed /56-FAM/TGCCATGTA/ZEN/TGCAACTGCTCTACCA/3IABkFQ/  
 region of ACACCCGTCTTTGATGCTAG  
 chromosome 6 ATGTTCTCACGCTCTGTTCTAG

---

**Table S5. Doubling time over 8 hours at 30° C**

| Strain                          | -BFA | +BFA |
|---------------------------------|------|------|
| BY4741 WT                       | 1.93 | 1.93 |
| <i>bre2Δ</i>                    | 2.12 | 3.24 |
| <i>bre1Δ</i>                    | 2.00 | 4.55 |
| <i>erg6Δ</i>                    | 1.86 | 5.83 |
| <i>set1Δ</i>                    | 2.07 | 3.54 |
| <i>spp1Δ</i>                    | 1.91 | 2.22 |
| <i>swd1Δ</i>                    | 1.94 | 2.67 |
| <i>swd3Δ</i>                    | 1.93 | 2.91 |
| <i>shg1Δ</i>                    | 2.00 | 2.02 |
| <i>erg4Δ</i>                    | 1.94 | 5.56 |
| <i>sdc1Δ</i>                    | 2.02 | 3.08 |
| <i>set2Δ</i>                    | 2.16 | 2.25 |
| <i>dot1Δ</i>                    | 1.99 | 2.03 |
| <i>dan1Δ</i>                    | 2.45 | 2.93 |
| <i>pdr11Δ</i>                   | 2.56 | 3.61 |
| <i>set3Δ</i>                    | 3.03 | 5.16 |
| <i>set1Δdan1Δ</i>               | 2.50 | 3.93 |
| <i>set1Δpdr11Δ</i>              | 2.39 | 4.23 |
| WT + ergosterol                 | 1.91 | 1.83 |
| <i>set1Δ</i> + ergosterol       | 1.82 | 1.74 |
| <i>dan1Δ</i> + ergosterol       | 2.66 | 2.92 |
| <i>pdr11Δ</i> + ergosterol      | 2.72 | 3.78 |
| <i>set1Δdan1Δ</i> + ergosterol  | 2.80 | 3.50 |
| <i>set1Δpdr11Δ</i> + ergosterol | 2.51 | 5.41 |
| WZY42 WT                        | 2.49 | 2.63 |
| <i>K4R</i>                      | 2.74 | 4.88 |
| <i>K36R</i>                     | 2.43 | 2.51 |
| <i>K79R</i>                     | 2.46 | 2.60 |
| <i>FY406 WT</i>                 | 2.20 | 2.28 |
| <i>YKG002 K123R</i>             | 2.32 | 3.16 |

## SUPPORTING INFORMATION

**Table S6. qRT-PCR analysis of *set1Δ* strain relative to WT**

| Gene name    | RQ   | Fold change relative to WT | P<.001 |
|--------------|------|----------------------------|--------|
| <i>HMG1</i>  | 0.46 | -2.17 +/- 0.06             | P<.001 |
| <i>HMG2</i>  | 0.33 | -3.03 +/- 0.06             | P<.001 |
| <i>ERG6</i>  | 0.84 | -1.19 +/- 0.12             | 0.042  |
| <i>ERG11</i> | 0.43 | -2.32 +/- 0.05             | P<.001 |
| <i>ERG5</i>  | 0.42 | -2.38 +/- 0.03             | P<.001 |
| <i>ERG4</i>  | 0.39 | -2.56 +/- 0.07             | P<.001 |
| <i>DAN1</i>  | 5.59 | 5.59 +/- 0.81              | P<.001 |
| <i>AUS1</i>  | 1.58 | 1.58 +/- 0.16              | 0.003  |
| <i>PDR11</i> | 2.45 | 2.45 +/- 0.34              | P<.001 |
| <i>SUT1</i>  | 0.78 | -1.28 +/- 0.11             | 0.036  |
| <i>SEC7</i>  | 0.79 | -1.26 +/- 0.13             | .059   |
| <i>GEA1</i>  | 0.90 | -1.11 +/- 0.16             | .282   |
| <i>ROX1</i>  | 0.81 | -1.23 +/- 0.04             | .002   |
| <i>MOT3</i>  | 0.83 | -1.20 +/- 0.09             | .077   |

**SUPPORTING INFORMATION**

**Table S7. qRT-PCR analysis of Wt, *set1Δ*, *set1Δ* +Set1, *set1Δ*+ Set1 H1017K**

| Strain                    | Gene name    | RQ   | Fold change relative to WT | P<.001 |
|---------------------------|--------------|------|----------------------------|--------|
| WT +pRS415                | <i>HMG1</i>  | 1    | 0                          |        |
| <i>set1Δ</i> +pRS415      | <i>HMG1</i>  | 0.55 | -1.81 +/- 0.08             | P<.001 |
| <i>set1Δ</i> +Set1        | <i>HMG1</i>  | 0.88 | -1.13 +/- 0.18             | 0.804  |
| <i>set1Δ</i> +Set1 H1017K | <i>HMG1</i>  | 0.55 | -1.81 +/- 0.13             | P<.01  |
| WT +pRS415                | <i>ERG11</i> | 1    | 0                          |        |
| <i>set1Δ</i> +pRS415      | <i>ERG11</i> | 0.54 | -1.85 +/- 0.04             | P<.001 |
| <i>set1Δ</i> +Set1        | <i>ERG11</i> | 1.02 | 1.02 +/- 0.07              | 0.373  |
| <i>set1Δ</i> +Set1 H1017K | <i>ERG11</i> | 0.53 | -1.89 +/- 0.06             | P<.001 |
| WT +pRS415                | <i>ERG4</i>  | 1    | 0                          |        |
| <i>set1Δ</i> +pRS415      | <i>ERG4</i>  | 0.54 | -1.85 +/- 0.08             | P<.001 |
| <i>set1Δ</i> +Set1        | <i>ERG4</i>  | 1.04 | 1.04 +/- 0.18              | 0.707  |
| <i>set1Δ</i> +Set1 H1017K | <i>ERG4</i>  | 0.66 | -1.51 +/- 0.13             | P<.001 |
| WT +pRS415                | <i>DAN1</i>  | 1    | 0                          |        |
| <i>set1Δ</i> +pRS415      | <i>DAN1</i>  | 4.44 | 4.44 +/- 0.89              | P<.001 |
| <i>set1Δ</i> +Set1        | <i>DAN1</i>  | 1.17 | 1.17 +/- 0.05              | 0.019  |
| <i>set1Δ</i> +Set1 H1017K | <i>DAN1</i>  | 5.33 | 5.33 +/- 1.01              | P<.001 |
| WT +pRS415                | <i>PDR11</i> | 1    | 0                          |        |
| <i>set1Δ</i> +pRS415      | <i>PDR11</i> | 2.14 | 2.14 +/- 0.24              | P<.001 |
| <i>set1Δ</i> +Set1        | <i>PDR11</i> | 0.95 | -1.05 +/- 0.11             | 0.678  |
| <i>set1Δ</i> +Set1 H1017K | <i>PDR11</i> | 3.05 | 3.05 +/- 0.60              | P<.001 |

**Table S8. qRT-PCR analysis of *set3Δ* strain relative to WT**

| Gene name    | RQ   | Fold change relative to WT | P<.001 |
|--------------|------|----------------------------|--------|
| <i>HMG1</i>  | 0.48 | -2.08 +/- 0.16             | P<.001 |
| <i>ERG11</i> | 0.41 | -2.43 +/- 0.08             | P<.001 |
| <i>DAN1</i>  | 1.34 | 1.34 +/- 0.46              | 0.52   |

## SUPPORTING INFORMATION

**Table S9. qRT-PCR analysis of *bre1Δ* strain relative to WT**

| Gene name    | RQ   | Fold change relative to WT | P<.001 |
|--------------|------|----------------------------|--------|
| <i>HMG1</i>  | 0.35 | -2.86 +/- 0.10             | P<.001 |
| <i>ERG11</i> | 0.26 | -3.85 +/- 0.07             | P<.001 |
| <i>DAN1</i>  | 4.03 | 4.03 +/- 1.25              | P<.001 |

**Table S1.0 qRT-PCR analysis of *dan1Δ* and *set1Δdan1Δ* strain relative to WT**

| strain            | Gene name    | RQ   | Fold change relative to WT | P<.001 |
|-------------------|--------------|------|----------------------------|--------|
| <i>dan1Δ</i>      | <i>HMG1</i>  | 0.73 | -1.36 +/- 0.02             | P<.001 |
|                   | <i>ERG11</i> | 1.06 | -1.06 +/- 0.25             | 0.67   |
|                   | <i>ERG4</i>  | 1.33 | 1.33 +/- 0.13              | 0.03   |
| <i>set1Δdan1Δ</i> | <i>HMG1</i>  | 0.37 | -2.70 +/- 0.02             | P<.001 |
|                   | <i>ERG11</i> | 0.52 | -1.92 +/- 0.25             | P<.001 |
|                   | <i>ERG4</i>  | 0.38 | -2.63 +/- 0.13             | P<.001 |

**Table S11.**

**qRT-PCR analysis of *K4R* and *K123R* strains relative to their respective WT strain**

| Strain       | Gene name    | RQ   | Fold change relative to WT | P<.001 |
|--------------|--------------|------|----------------------------|--------|
| <i>K4R</i>   | <i>HMG1</i>  | 0.52 | -1.91 +/- 0.06             | P<.001 |
|              | <i>ERG11</i> | 0.64 | -1.56 +/- 0.06             | P<.001 |
|              | <i>DAN1</i>  | 2.19 | 2.19 +/- 0.10              | P<.001 |
| <i>K123R</i> | <i>HMG1</i>  | 0.40 | -2.5 +/- 0.09              | P<.001 |
|              | <i>ERG11</i> | 0.68 | -1.47 +/- 0.05             | P<.001 |
|              | <i>DAN1</i>  | 2.51 | 2.51 +/- 0.11              | P<.001 |

### Supporting References

1. Fingerman IM, Li HC, & Briggs SD (2007) A charge-based interaction between histone H4 and Dot1 is required for H3K79 methylation and telomere silencing: identification of a new trans-histone pathway. *Genes & development* 21(16):2018-2029.
2. Gardner KE, Zhou L, Parra MA, Chen X, & Strahl BD (2011) Identification of lysine 37 of histone H2B as a novel site of methylation. *PLoS.One.* 6(1):e16244.
